# Supplementary material for: Using indirect protein interactions for the prediction of Gene Ontology functions
Source: PubMed Central journal article supplement (PMC1892087; doi:10.1186/1471-2105-8-s4-s8), 2007-05-22
Supplement: 1471-2105-8-S4-S8-S1.pdf [file 1471-2105-8-S4-S8-S1.pdf]

# Using Indirect Protein Interactions for the prediction of Gene Ontology functions

Hon Nian Chua, Wing-Kin Sung, Limsoon Wong<sup>§</sup>

National University of Singapore, School of Computing, 3 Science Drive 2, Singapore 117543

<sup>§</sup>Corresponding author

Email addresses:

HNC: [g0306417@nus.edu.sg](mailto:g0306417@nus.edu.sg)

WKS: [ksung@comp.nus.edu.sg](mailto:ksung@comp.nus.edu.sg)

LW: [wongls@comp.nus.edu.sg](mailto:wongls@comp.nus.edu.sg)

## Supplementary Results

### Function prediction using FS-Weighted Averaging

#### *Precision–Recall Analysis*

Figure S1 shows the precision versus recall graphs for the prediction of informative GO terms for the *molecular function* and *cellular component* categories.

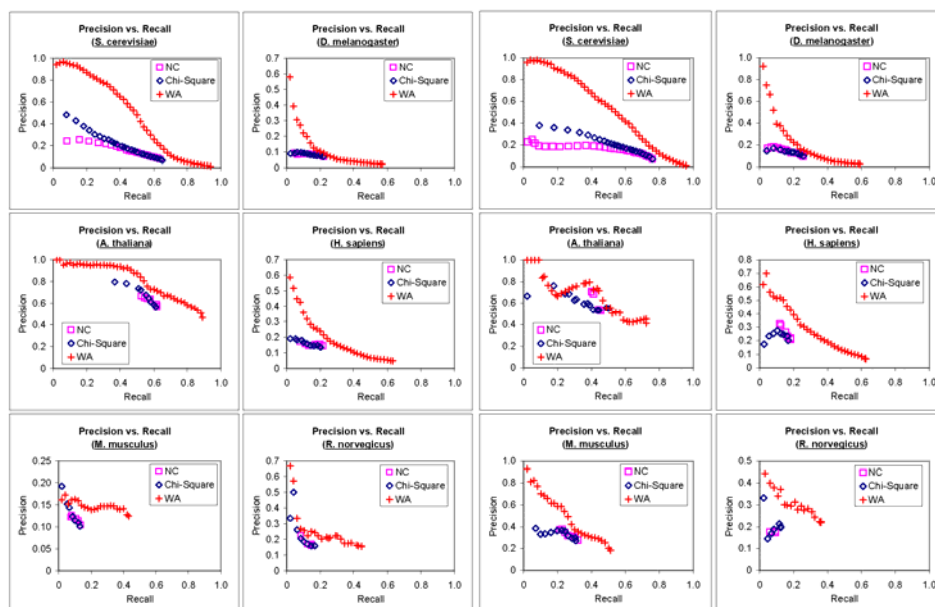

**Figure S1 – Precision–Recall Analysis of predictions by three methods**

Precision vs. Recall graphs of the predictions of informative GO terms from the Gene Ontology biological process category using 1) *Neighbor Counting* (NC); 2) *Chi-Square*; and 3) *FS-Weighted Averaging* (WA) for seven genomes.

*Left* – Graphs for GO terms from the *molecular function* category

*Right* – Graphs for GO terms from the *cellular component* category

## Receiver Operating Characteristics

Figure S2 shows the number of informative GO terms from the *molecular function* and *cellular component* categories that can be predicted equal or above a range of ROC thresholds.

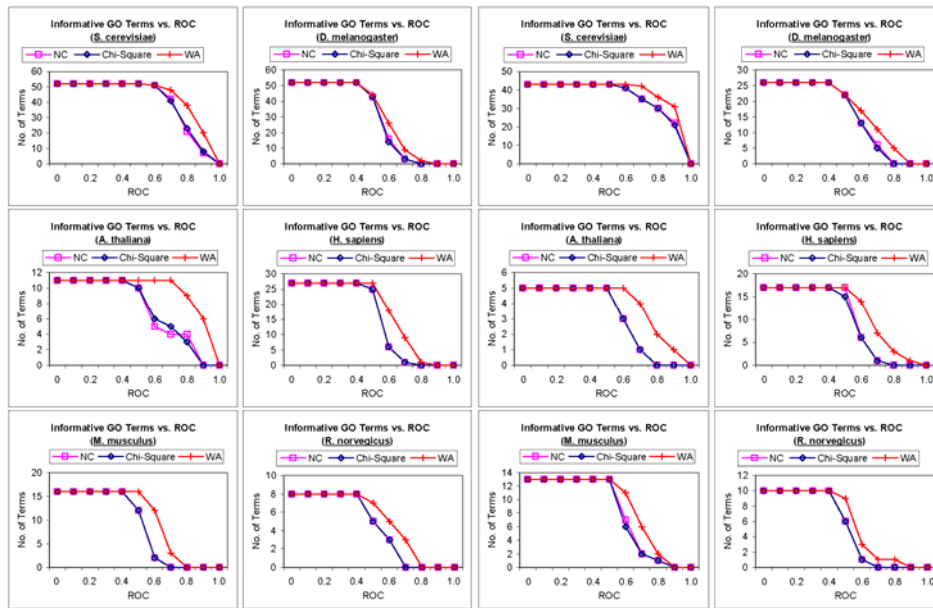

**Figure S2 - ROC Analysis of predictions by three methods**

Graphs showing the number of informative terms from the Gene Ontology biological process category that can be predicted above or equal various ROC thresholds using 1) *Neighbor Counting (NC)*; 2) *Chi-Square*; and 3) *FS-Weighted Averaging (WA)* for seven genomes.

*Left* – Graphs for GO terms from the *molecular function* category

*Right* – Graphs for GO terms from the *cellular component* category
